# Supplementary material for: Identification of disulfiram as a secretase-modulating compound with beneficial effects on Alzheimer’s disease hallmarks
Source: PubMed Central journal article supplement (PMC5778060; doi:10.1038/s41598-018-19577-7), 2018-01-22
Supplement: 41598_2018_19577_MOESM1_ESM.pdf [file 41598_2018_19577_MOESM1_ESM.pdf]

**Identification of disulfiram as a secretase-modulating compound with beneficial effects on Alzheimer's disease hallmarks**

Dr. rer. nat. Sven Reinhardt, Dipl.-Biol. Nicolai Stoye, Dr. med. Mathias Luderer, Prof. Dr. Falk Kiefer,  
Prof. Dr. Ulrich Schmitt, Prof. Dr. Klaus Lieb, Dr. rer. nat. Kristina Endres

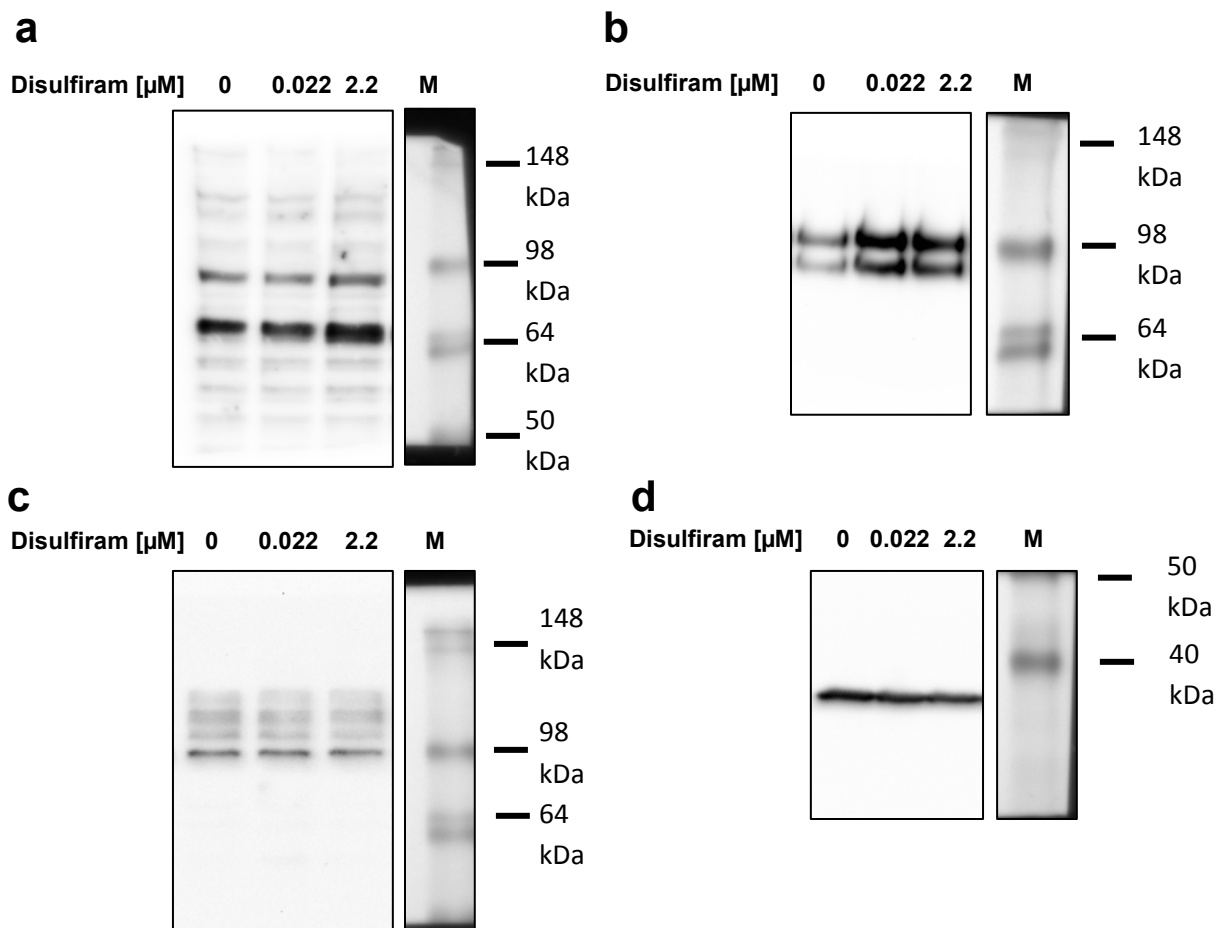

**Suppl. Fig. 1** Examples of full-length blots from Fig. 2 C

Western Blot pictures in Fig. 2 C have been cropped for being able to combine several blots in one picture. Here, examples of full-length blots for each protein-detection are given where possible. Blots with cell lysates were cut at a height between 50 and 40 kDa to use the upper blot part for detection of ADAM10 or full-length APP and the lower blot part for detection of GAPDH. a) ADAM10; b) sAPP-alpha; c) APP; d) GAPDH. The lane with the marker (M) has been added to indicate molecular weights.

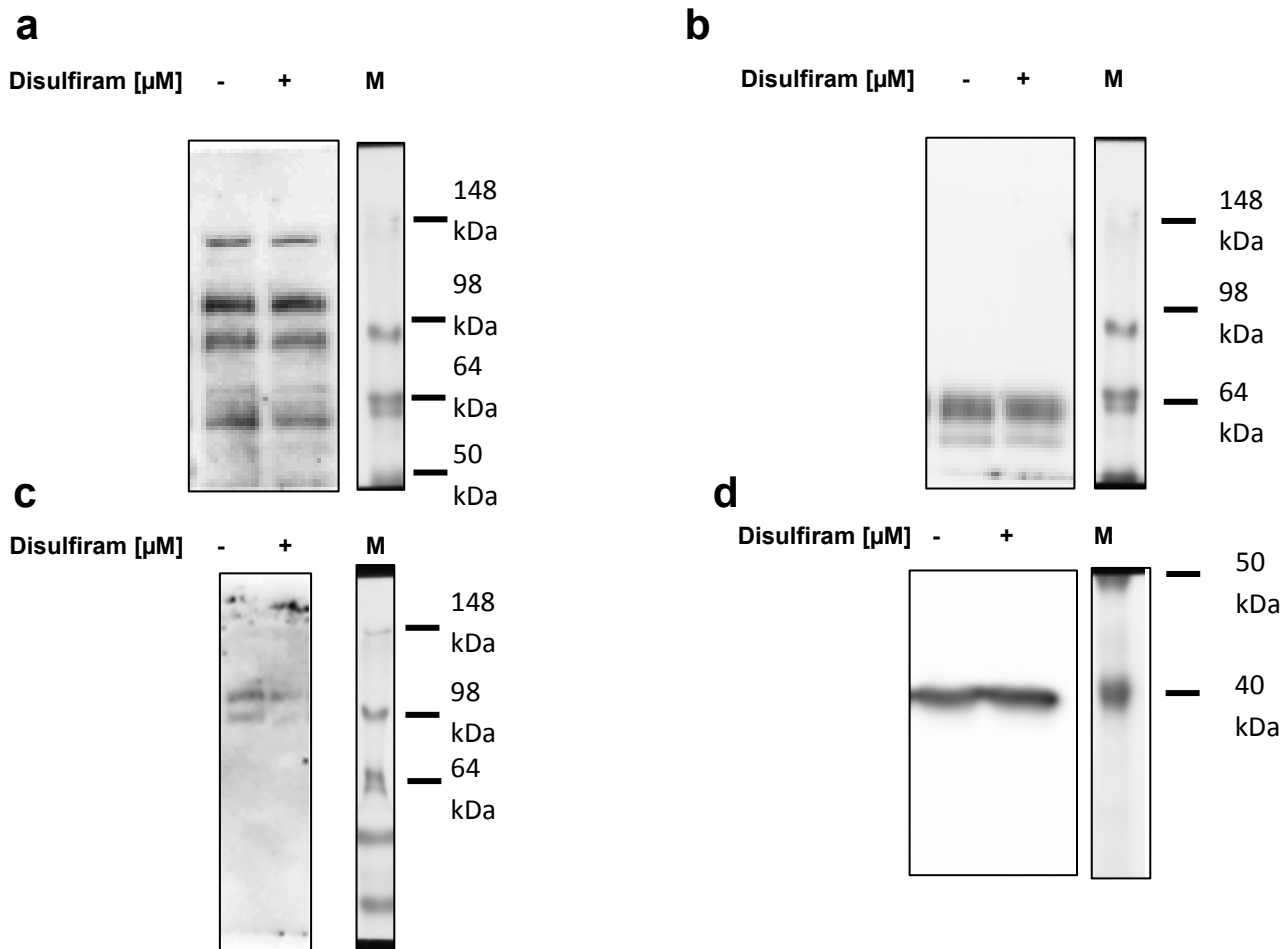

**Suppl. Fig. 2** Examples of full-length blots from Fig. 3

Western Blot pictures in Fig. 3 have been cropped for presentation. Exemplary pictures of full-length blots for each protein-detection are given where possible. Blots with cell lysates (BACE1, TACE) were cut at a height between 50 and 40 kDa to use the upper blot part for detection of the proteinases and the lower blot part for detection of GAPDH. a) TACE; b) BACE1; c) sAPP-beta; d) GAPDH. The lane with the marker (M) has been added to indicate molecular weights.

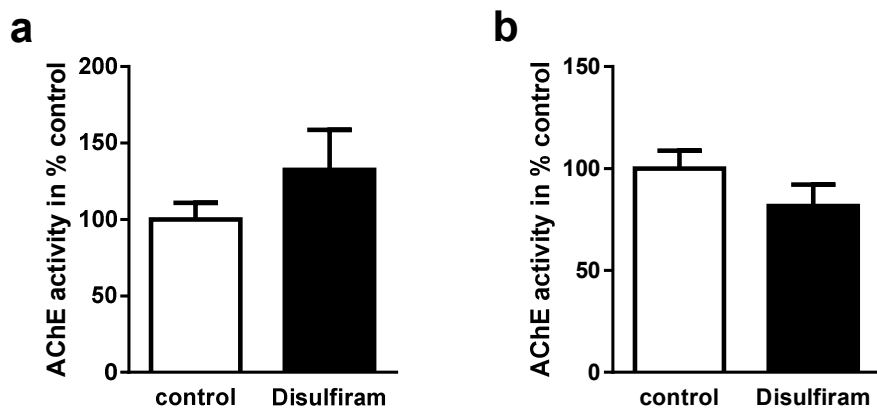

**Suppl. Fig. 3** Acetylcholine esterase activity in brain and ileum of disulfiram-treated AD model mice

Tissue from mice treated for two days with disulfiram or DMSO as control were sacrificed and brain and ileum tissue collected (ileum tissue was mechanically purified and washed with PBS). Homogenates of tissue samples were prepared in potassium phosphate buffer and diluted aliquots used for measuring AChE activity with Ellman's reaction (a: brain; b: ileum;  $n \geq 9$  per group). Values are given as mean + SEM, statistical analysis was conducted by unpaired Student's t-test (Welsh correction for analysis of data from brain; ns,  $p > 0.05$ ).

**Suppl. Table 1** FDA-approved drugs tested for ADAM10 and BACE-1 promoter regulatory effect

Substances were initially tested for potential toxic/ proliferative effects in SH-SY5Y cells and subsequently diluted to obtain the final concentration in the dual promoter assay. 13 drugs were excluded because of remaining toxic effects and are therefore not included in the list.

| Nr. | Drug                       | final conc. [µM] | Nr. | Drug                               | final conc. [µM] | Nr. | Drug                                 | final conc. [µM] |
|-----|----------------------------|------------------|-----|------------------------------------|------------------|-----|--------------------------------------|------------------|
| 1   | Moroxydine HCl             | 3,15             | 101 | Sulpiride s(-)                     | 1,91             | 201 | Denbutylline                         | 2,04             |
| 2   | Clindamycin HCl            | 1,54             | 102 | Diphenhydramine HCl                | 2,56             | 202 | Miltefosine                          | 1,60             |
| 3   | Felbamate                  | 2,74             | 103 | Promethazine HCl                   | 2,30             | 203 | Latanoprost                          | 1,51             |
| 4   | Cyclosporin a              | 0,54             | 104 | Ranitidine HCl                     | 2,08             | 204 | Ouabain                              | 0,02             |
| 5   | Donepezil HCl              | 1,57             | 105 | Naltrindole HCl                    | 1,58             | 205 | Clopidamide                          | 1,89             |
| 6   | Lincomycin                 | 1,61             | 106 | Idazoxan                           | 3,20             | 206 | Molsidomine                          | 2,70             |
| 7   | Lomofungin                 | 2,08             | 107 | Spiperone                          | 1,65             | 207 | Pravadoline                          | 1,73             |
| 8   | Mycophenolic acid          | 0,08             | 108 | Epinephrine-(+)-tartrate l(-)      | 3,86             | 208 | Tranilast                            | 2,00             |
| 9   | Novobiocin Na              | 1,07             | 109 | Xylazine HCl                       | 2,97             | 209 | Alfuzosin                            | 1,68             |
| 10  | Rapamycin                  | 0,71             | 110 | Norepinephrine-(+)-tartrate (-)    | 2,05             | 210 | Bromocriptine mesylate               | 1,00             |
| 11  | Spectinomycin              | 1,97             | 111 | Quetiapine fumarate                | 0,74             | 211 | Clozapine                            | 2,00             |
| 12  | Bepiridil                  | 1,58             | 112 | Alprenolol HCl                     | 2,62             | 212 | Clothiapine                          | 1,90             |
| 13  | Amlodarone                 | 1,01             | 113 | Imipramine HCl                     | 2,33             | 213 | Actretin                             | 2,00             |
| 14  | Nicardipine                | 1,27             | 114 | Amoxapine                          | 2,08             | 214 | Remoxipride                          | 1,76             |
| 15  | Pimozide                   | 1,42             | 115 | Mesulegine HCl                     | 1,80             | 215 | Calcifediol                          | 1,63             |
| 16  | Loperamide                 | 1,27             | 116 | Amfebutamone                       | 2,73             | 216 | Calcitriol                           | 1,57             |
| 17  | Fluspirilene               | 1,37             | 117 | Metoclopramide HCl                 | 2,18             | 217 | Ketoconazole                         | 1,23             |
| 18  | Tolbutamide                | 2,42             | 118 | Naltriben methanesulfonate hydrate | 1,28             | 218 | Oxatomide                            | 1,53             |
| 19  | Pinacidil                  | 2,66             | 119 | Vitamin a (acetate)                | 1,99             | 219 | Disodium cromoglycate                | 1,28             |
| 20  | Glipizide                  | 1,47             | 120 | Levallorphan tartrate              | 2,31             | 220 | Capsaicin                            | 2,14             |
| 21  | PhentolamineHCl            | 2,06             | 121 | Nalbuphine HCl                     | 1,83             | 221 | Dexamethasone                        | 1,67             |
| 22  | Quinine                    | 1,81             | 122 | Carbamylcholine Cl                 | 4,44             | 222 | Dipyridamole                         | 1,30             |
| 23  | Flufenamic acid            | 2,32             | 123 | Carbamyl-beta-methylcholine Cl     | 4,05             | 223 | Ethacrynic acid                      | 2,16             |
| 24  | Propafenone                | 1,91             | 124 | Butyrylcholine Cl                  | 3,75             | 224 | Indomethacin                         | 1,83             |
| 25  | Phenytoin                  | 2,59             | 125 | Famotidine                         | 1,94             | 225 | Naproxen                             | 2,84             |
| 26  | Procainamide               | 2,40             | 126 | Terfenadine                        | 1,39             | 226 | Clofibrate                           | 2,69             |
| 27  | Lidocaine                  | 2,41             | 127 | Isoniazid                          | 4,77             | 227 | Ibuprofen                            | 3,17             |
| 28  | Flecainide                 | 1,38             | 128 | Ticlopidine HCl                    | 2,48             | 228 | Benserazide HCl                      | 2,54             |
| 29  | Rosiglitazone maleate      | 1,38             | 129 | Amorolfine                         | 2,06             | 229 | Debrisoquin sulfate                  | 3,73             |
| 30  | Amantadine HCl             | 3,48             | 130 | Clemastine fumarate                | 1,90             | 230 | Actarit                              | 3,38             |
| 31  | Oxymetazoline HCl          | 2,51             | 131 | Vardenafil                         | 1,34             | 231 | Bumetanide                           | 1,79             |
| 32  | Ifenprodil                 | 2,01             | 132 | Linezolid                          | 1,94             | 232 | Neomycin sulfate                     | 1,06             |
| 33  | Naftopidil 2HCl            | 1,67             | 133 | Docetaxil                          | 0,01             | 233 | Auranofin                            | 0,02             |
| 34  | Prazosin HCl               | 1,56             | 134 | Olopatadine                        | 1,94             | 234 | Captopril                            | 3,01             |
| 35  | Clonidine HCl              | 2,45             | 135 | Manidipine                         | 1,07             | 235 | Docebenone                           | 2,00             |
| 36  | Guanabenz acetate          | 2,83             | 136 | Tolcapone                          | 2,39             | 236 | Tranlycypromine                      | 4,91             |
| 37  | Rilmenidine hemifumarate   | 3,63             | 137 | Gestrinone                         | 2,12             | 237 | Piroxicam                            | 1,97             |
| 38  | Buphenine                  | 1,95             | 138 | Olmesartan                         | 1,17             | 238 | Moxifloxacin HCl                     | 1,49             |
| 39  | Yohimbine HCl              | 1,67             | 139 | Nisoldipine                        | 1,68             | 239 | Troleandomycin                       | 0,01             |
| 40  | Dihydroergotamine mesylate | 1,12             | 140 | Lacidipine                         | 1,43             | 240 | Carbidopa                            | 2,89             |
| 41  | Nicefingolone              | 1,35             | 141 | Olanzapine                         | 2,09             | 241 | Nimesulide                           | 2,12             |
| 42  | Emtricitabine              | 2,64             | 142 | Lovastatin                         | 1,62             | 242 | Ketoprofen                           | 2,57             |
| 43  | Betaxolol HCl              | 2,13             | 143 | Lamotrigine                        | 2,55             | 243 | Meloxicam                            | 1,86             |
| 44  | Pioglitazone               | 2,45             | 144 | Azathioprine                       | 2,36             | 244 | Terbinafine HCl                      | 2,24             |
| 45  | Timolol maleate (s)        | 2,07             | 145 | Sildenafil                         | 1,38             | 245 | Sodium phenylbutyrate                | 3,51             |
| 46  | Xamoterol hemifumarate     | 1,93             | 146 | Atovaquone                         | 1,78             | 246 | Ergothioneine                        | 2,85             |
| 47  | Clenbuterol                | 2,36             | 147 | Sertaconazole                      | 1,49             | 247 | Ambroxol                             | 1,73             |
| 48  | Procaterol HCl             | 2,25             | 148 | Butenafine                         | 2,06             | 248 | Idobenone                            | 1,93             |
| 49  | Salbutamol sulfate         | 2,73             | 149 | Dorzolamide                        | 2,01             | 249 | Mevastatin                           | 1,67             |
| 50  | Pindolol                   | 2,63             | 150 | Escitalopram                       | 2,01             | 250 | Sinvastatin                          | 1,56             |
| 51  | Cimetrol HCl               | 2,98             | 151 | Eprosartan                         | 1,54             | 251 | Suramin sodium                       | 0,51             |
| 52  | Dobutamine HCl             | 2,17             | 152 | Sodium phenylacetate               | 4,13             | 252 | Goserelin acetate                    | 0,51             |
| 53  | Pronethalol HCl            | 0,11             | 153 | Ozagrel                            | 2,86             | 253 | Guaiacol                             | 5,26             |
| 54  | Sotalol HCl                | 2,40             | 154 | Entacapone                         | 2,14             | 254 | Retinoic acid                        | 2,18             |
| 55  | Maprotiline HCl            | 2,36             | 155 | Bopindolol malonate                | 1,72             | 255 | Troglitazone                         | 1,48             |
| 56  | Nisoxetine HCl             | 2,41             | 156 | Guanfacine HCl                     | 2,31             | 256 | Bezafibrate                          | 1,81             |
| 57  | Canthaxanthin              | 1,16             | 157 | Tizanidine HCl                     | 2,58             | 257 | Raloxifene HCl                       | 0,06             |
| 58  | Pilocarpine HCl            | 3,14             | 158 | Meglumine                          | 3,35             | 258 | Etoposide                            | 0,04             |
| 59  | Ipratropium Br             | 1,97             | 159 | Propranolol HCl s(-)               | 2,21             | 259 | Mitomycin c                          | 0,08             |
| 60  | Pirenzepine 2HCl           | 1,86             | 160 | Carvedilol                         | 1,61             | 260 | Puromycin 2HCl                       | 1,20             |
| 61  | Telenzepine 2HCl           | 1,76             | 161 | Cerivastatin                       | 0,06             | 261 | Delavirdine mesylate                 | 0,06             |
| 62  | Tropicamide                | 2,30             | 162 | Aclarubicin                        | 0,02             | 262 | 10-hydroxycamptothecin               | 0,04             |
| 63  | Pancuronium Br             | 1,14             | 163 | Flumazenil                         | 2,15             | 263 | Doxorubicin HCl                      | 0,05             |
| 64  | Ivermectin                 | 0,75             | 164 | Fenretinide                        | 1,67             | 264 | Cetirizine 2HCl                      | 1,42             |
| 65  | Physostigmine sulfate      | 2,37             | 165 | Gefitinib                          | 1,46             | 265 | Lapatinib                            | 0,04             |
| 66  | Nialamide                  | 2,19             | 166 | Ibudilast                          | 2,84             | 266 | Methyl salicylate                    | 0,17             |
| 67  | Haloperidol HCl            | 1,74             | 167 | Imatinib                           | 1,32             | 267 | Pioglitazone                         | 1,83             |
| 68  | Piribedil HCl              | 2,19             | 168 | Montelukast                        | 1,11             | 268 | Pranlukast                           | 1,36             |
| 69  | Mepyramine maleate         | 2,29             | 169 | Deprenyl                           | 2,92             | 269 | Rivastigmine                         | 2,61             |
| 70  | Trans-triprolidine HCl     | 0,05             | 170 | Vatalanib                          | 1,88             | 270 | Rofecoxib                            | 2,08             |
| 71  | Cimetidine                 | 2,59             | 171 | Fumagillin                         | 1,43             | 271 | Ergotamine D-tartrate                | 1,12             |
| 72  | Tiotidine                  | 2,09             | 172 | Exemestane                         | 2,21             | 272 | Sulindac                             | 1,83             |
| 73  | Zonisamide                 | 3,08             | 173 | Dinoprostone                       | 1,85             | 273 | Valproic acid                        | 0,18             |
| 74  | Zoledronic acid            | 2,40             | 174 | Metformin                          | 5,06             | 274 | Calcipotriene                        | 1,58             |
| 75  | Naltrexone HCl             | 1,91             | 175 | Anagrelide                         | 2,55             | 275 | Zafirlukast                          | 0,01             |
| 76  | zolmitriptan               | 2,15             | 176 | Dofetilide                         | 1,48             | 276 | Zileuton                             | 0,11             |
| 77  | Memantine HCl              | 3,65             | 177 | Erlotinib                          | 1,66             | 277 | Pentamidine                          | 1,92             |
| 78  | Aniracetam                 | 2,98             | 178 | Lobeline                           | 1,94             | 278 | Bambuterol                           | 1,78             |
| 79  | Riluzole HCl               | 2,79             | 179 | Melatonin                          | 2,81             | 279 | Fentiazac                            | 1,98             |
| 80  | Propofol                   | 3,67             | 180 | Dinoprost                          | 1,84             | 280 | Mephenytoin                          | 2,99             |
| 81  | Mianserin HCl              | 2,47             | 181 | HA1077                             | 1,79             | 281 | Diazoxide                            | 2,83             |
| 82  | Aminophylline              | 3,63             | 182 | Hydroxytacrine maleate             | 3,05             | 282 | Glyburide                            | 1,32             |
| 83  | Furafylline                | 2,51             | 183 | Oxotremorine sesquifumarate        | 3,17             | 283 | Minoxidil                            | 3,12             |
| 84  | nateglinide                | 2,06             | 184 | Tacrine HCl                        | 3,30             | 284 | Tolazamide                           | 2,10             |
| 85  | Isoproterenol              | 3,09             | 185 | Gallamine triethiodide             | 1,28             | 285 | Nicorandil                           | 0,12             |
| 86  | AcetyldiholoneCl           | 4,47             | 186 | Galanthamine HBr                   | 2,27             | 286 | Bexarotene                           | 0,08             |
| 87  | Atropine sulfate           | 2,26             | 187 | Amiloride                          | 2,46             | 287 | Tranexamic acid                      | 4,16             |
| 88  | Decamethonium 2Br          | 2,53             | 188 | Amlodipine                         | 1,60             | 288 | Celecoxib                            | 1,71             |
| 89  | Mecamylamine HCl           | 3,91             | 189 | Nifedipine                         | 1,45             | 289 | Levetiracetam                        | 3,84             |
| 90  | Neostigmine Br             | 2,93             | 190 | Diltiazem                          | 1,89             | 290 | Letrozole                            | 2,29             |
| 91  | Strychnine HCl             | 1,95             | 191 | Nimodipine                         | 1,56             | 291 | Abamectin                            | 0,75             |
| 92  | Tubocurarine Cl (+)        | 1,07             | 192 | Nitrendipine                       | 1,81             | 292 | Alfalcaldol                          | 1,63             |
| 93  | Butaciamol (+)             | 1,81             | 193 | Verapamil                          | 1,33             | 293 | Anethole-trithione (anetholtrithion) | 2,72             |
| 94  | Apomorphine r (-)          | 2,44             | 194 | Niguldipine HCl                    | 1,01             | 294 | Anastrozole                          | 0,04             |
| 95  | Chlorpromazine HCl         | 2,05             | 195 | Flunarizine-2HCl                   | 1,37             | 295 | Bicalutamide                         | 1,52             |
| 96  | Domperidone                | 1,53             | 196 | Gabapentin                         | 3,82             | 296 | Clodronate disodium                  | 2,67             |
| 97  | Fluphenazine 2HCl          | 1,49             | 197 | Felodipine                         | 1,70             | 297 | Clindamycin palmitate                | 1,54             |
| 98  | Pergolide mesylate         | 2,08             | 198 | Clinidipine                        | 1,33             | 298 | Vorinostat                           | 0,10             |
| 99  | Raclopride l-tartrate s(-) | 1,88             | 199 | Phenoxybenzamine HCl               | 1,92             | 299 | Didanosine                           | 2,77             |
| 100 | Risperidone                | 1,59             | 200 | Trifluoperazine 2HCl               | 1,36             | 300 | Dolasetron                           | 2,01             |

| Nr. | Drug                         | final conc. [µM] | Nr. | Drug                           | final conc. [µM] | Nr. | Drug                         | final conc. [µM] |
|-----|------------------------------|------------------|-----|--------------------------------|------------------|-----|------------------------------|------------------|
| 301 | Enalaprilat                  | 1,88             | 401 | Dehydroepiandrosterone         | 2,27             | 501 | Pantoprazole                 | 1,70             |
| 302 | Fluvastatin Na               | 1,59             | 402 | Desloratadine                  | 2,10             | 502 | Paroxetine HCl               | 1,98             |
| 303 | Fosinopril                   | 1,16             | 403 | Dextromethorphan HBr           | 2,41             | 503 | Pazufloxacin                 | 2,05             |
| 304 | Gemcitabine HCl              | 2,48             | 404 | Diclofenac, Na                 | 2,21             | 504 | Pefloxacin mesylate          | 1,96             |
| 305 | Ginkgolide a                 | 0,06             | 405 | 2',3'-dideoxycytidine          | 3,09             | 505 | Penciclovir                  | 2,58             |
| 306 | Granisetron                  | 2,09             | 406 | Diethylstilbestrol             | 2,44             | 506 | Pentoxifylline               | 2,35             |
| 307 | Nedaplatin                   | 2,16             | 407 | Diflunisal                     | 2,61             | 507 | Pencilin v potassium         | 1,87             |
| 308 | Oxaliplatin                  | 1,65             | 408 | Disulfiram                     | 2,20             | 508 | Phenylbutazone               | 2,12             |
| 309 | Anethole, trans-             | 4,41             | 409 | Doxazosin mesylate             | 1,45             | 509 | Piperacillin                 | 1,26             |
| 310 | Atazanavir                   | 0,93             | 410 | Doxifluridine                  | 2,65             | 510 | Pravastatin lactone          | 1,61             |
| 311 | Mycophenolate mofetil        | 0,06             | 411 | Doxofylline                    | 2,45             | 511 | Pranoprofen                  | 2,56             |
| 312 | Etoricoxib                   | 1,82             | 412 | Doxycycline HCl                | 1,47             | 512 | Prednisolone                 | 1,81             |
| 313 | Clofarabine                  | 2,15             | 413 | Enalapril                      | 1,74             | 513 | Progesterone                 | 2,08             |
| 314 | Cabergoline                  | 1,45             | 414 | Enoxacin                       | 2,04             | 514 | Procarbazine HCl             | 2,95             |
| 315 | Dilazep                      | 1,08             | 415 | Enrofloxacin                   | 1,82             | 515 | Prothionamide                | 3,63             |
| 316 | Ibandronate                  | 2,05             | 416 | Ethisterone                    | 2,09             | 516 | Prednisone                   | 1,82             |
| 317 | Imipenem                     | 2,18             | 417 | Esomeprazole potassium         | 1,89             | 517 | Pregnenolone                 | 2,07             |
| 318 | Lomustine                    | 2,80             | 418 | Estradiol                      | 2,40             | 518 | Primaquine phosphate         | 2,52             |
| 319 | Iloprost                     | 1,81             | 419 | Estrinol                       | 2,27             | 519 | Praziquantel                 | 2,09             |
| 320 | Lomerizidine HCl             | 1,39             | 420 | Estrone                        | 2,42             | 520 | Pyrantel pamoate             | 1,10             |
| 321 | Lofexidine                   | 2,52             | 421 | Etilonate 2Na                  | 3,20             | 521 | Quinacrine 2HCl dihydrate    | 0,07             |
| 322 | Meropenem                    | 1,70             | 422 | Etretinate                     | 1,84             | 522 | Quinapril HCl                | 1,49             |
| 323 | Nifekalant HCl               | 1,61             | 423 | Trichloromethiazide            | 1,72             | 523 | Racecadotril                 | 1,70             |
| 324 | Octreotide                   | 0,64             | 424 | Famciclovir                    | 2,03             | 524 | Ranolazine 2HCl              | 1,53             |
| 325 | Oseltamivir                  | 2,09             | 425 | Fenbendazole                   | 0,09             | 525 | Ramipril                     | 1,57             |
| 326 | Pamidronic acid              | 2,78             | 426 | Fenbufen                       | 2,57             | 526 | Rebamipide                   | 1,76             |
| 327 | Pramipexole                  | 3,09             | 427 | Fenoldopam mesylate            | 2,14             | 527 | Ribavirin                    | 2,68             |
| 328 | Triptorelin                  | 0,50             | 428 | Fenoprofen                     | 2,70             | 528 | Nelfinavir mesylate          | 0,98             |
| 329 | Rifamycin sv                 | 0,94             | 429 | Fenofibrate                    | 1,81             | 529 | Rimantadine HCl              | 3,65             |
| 330 | Risedronic acid              | 2,31             | 430 | Finasteride                    | 1,75             | 530 | Propranolol                  | 2,52             |
| 331 | Rocuronium bromide           | 1,23             | 431 | 5-fluorouracil                 | 5,02             | 531 | Roxatidine acetate HCl       | 1,88             |
| 332 | Ricobendazole                | 2,32             | 432 | Flurbiprofen                   | 2,68             | 532 | Roxithromydin                | 0,78             |
| 333 | Sulbactam                    | 2,80             | 433 | Fleroxacin                     | 1,77             | 533 | Rufloxacin                   | 1,80             |
| 334 | Thiamphenicol glydinate      | 1,58             | 434 | Amitriptyline HCl              | 2,08             | 534 | Sarafloxacin HCl             | 1,70             |
| 335 | Tulobuterol                  | 2,87             | 435 | Floxuridine                    | 2,65             | 535 | Scopolamine n-butylbromide   | 1,81             |
| 336 | Vinorelbine                  | 0,03             | 436 | Fluocinonide acetamide         | 1,44             | 536 | Scopolamine HBr              | 2,15             |
| 337 | Vindesine                    | 0,03             | 437 | Flubendazole                   | 0,08             | 537 | Secnidazole                  | 3,53             |
| 338 | Salmeterol                   | 1,57             | 438 | Flutamide                      | 2,37             | 538 | Sibutramine HCl              | 2,34             |
| 339 | Vincristine sulfate          | 0,03             | 439 | Fluconazole                    | 2,13             | 539 | Sparfloxacin                 | 1,67             |
| 340 | Acemetacin                   | 1,57             | 440 | Formestane                     | 2,16             | 540 | Spironolactone               | 1,57             |
| 341 | Acetylsalicylic acid         | 3,63             | 441 | Tofarur                        | 3,27             | 541 | Stanozolol                   | 1,99             |
| 342 | Acipimox                     | 4,24             | 442 | Furosemide                     | 1,98             | 542 | Streptomycin sulfate         | 0,04             |
| 343 | Acetofenac                   | 1,85             | 443 | Ganciclovir                    | 2,56             | 543 | Sulfadoxine                  | 2,11             |
| 344 | Acycloguanosine              | 2,90             | 444 | Gatifloxacin                   | 1,74             | 544 | Sulfadiazine                 | 2,61             |
| 345 | 3'-azido-3'-deoxythymidine   | 2,45             | 445 | Gentamycin sulfate             | 1,37             | 545 | Sulfadimethoxine             | 2,11             |
| 346 | Allopurinol                  | 4,80             | 446 | Gemfibrozil                    | 2,61             | 546 | Tamsulosin HCl               | 1,64             |
| 347 | Alendronate                  | 2,63             | 447 | Gliclazide                     | 2,02             | 547 | Tamsulosin HCl               | 1,64             |
| 348 | Altretamine                  | 3,11             | 448 | Glimepirid                     | 1,33             | 548 | Telmisartan                  | 1,27             |
| 349 | Albendazole                  | 0,10             | 449 | Guaifenesin                    | 3,30             | 549 | Tenoxicam                    | 1,94             |
| 350 | Sumatriptan succinate        | 1,58             | 450 | Hexestrol                      | 2,42             | 550 | Terazosin HCl                | 1,69             |
| 351 | Amifostine                   | 3,05             | 451 | Hydrocortisone                 | 1,80             | 551 | Tetracycline                 | 1,47             |
| 352 | Di-aminoglutethimide         | 2,81             | 452 | Hydrocortisone 21-acetate      | 1,62             | 552 | Tenatoprazole                | 1,89             |
| 353 | 4-aminosalicylic acid        | 4,27             | 453 | 17-hydroxyprogesterone         | 1,98             | 553 | Temozolomide                 | 3,37             |
| 354 | 5-aminosalicylic acid        | 4,27             | 454 | Iodoxuridine                   | 1,85             | 554 | Tibolone                     | 2,09             |
| 355 | Ampicillin trihydrate        | 1,87             | 455 | Ifosfamide                     | 2,50             | 555 | Tioconazole                  | 1,69             |
| 356 | Ampiroxycam                  | 1,46             | 456 | Imiquimod                      | 2,72             | 556 | Tinidazole                   | 2,64             |
| 357 | Apramycin                    | 1,21             | 457 | Indapamide                     | 1,79             | 557 | Tobramycin (free base)       | 1,40             |
| 358 | Artemisinin                  | 2,31             | 458 | Ilopride HCl                   | 1,82             | 558 | Tosufloxacin                 | 1,62             |
| 359 | Atenolol                     | 2,45             | 459 | Itraconazole                   | 0,93             | 559 | Topotecan                    | 0,06             |
| 360 | Atracurium besylate          | 0,70             | 460 | Ketoprofen+D153                | 2,57             | 560 | Toremifene                   | 1,61             |
| 361 | Azaperone                    | 2,00             | 461 | Levamisole HCl                 | 3,20             | 561 | Tofenamic acid               | 2,50             |
| 362 | Vinblastine sulfate          | 0,03             | 462 | Levonorgestrel                 | 2,09             | 562 | Tolmetin Na                  | 0,10             |
| 363 | Azithromycin                 | 0,87             | 463 | Levodopa                       | 3,31             | 563 | Amoxicillin                  | 1,79             |
| 364 | Aztreonam                    | 1,50             | 464 | Levofloxacin HCl               | 1,81             | 564 | Tramadol HCl                 | 0,10             |
| 365 | Betamethasone                | 1,30             | 465 | Leflunomide                    | 2,42             | 565 | Triamcinolone                | 1,66             |
| 366 | Bifonazole                   | 2,11             | 466 | Lisinopril                     | 1,61             | 566 | Trimethoprim                 | 2,25             |
| 367 | Bisacodyl                    | 1,81             | 467 | Lomefloxacin HCl               | 1,86             | 567 | Tropisetron HCl              | 0,09             |
| 368 | Bromhexine HCl               | 1,74             | 468 | Loratadine                     | 1,71             | 568 | Tylosin tartrate             | 0,03             |
| 369 | Buspirone HCl                | 1,70             | 469 | Lorglumide                     | 1,42             | 569 | Valaciclovir                 | 2,02             |
| 370 | Canrenone                    | 1,92             | 470 | Losartan potassium             | 1,42             | 570 | Vecuronium Br                | 0,05             |
| 371 | Carbadox                     | 2,49             | 471 | Mebendazol                     | 0,09             | 571 | Venlafaxine HCl              | 2,36             |
| 372 | Carboplatin                  | 1,94             | 472 | Medroxyprogesterone-17 acetate | 1,69             | 572 | Vidarabine                   | 0,02             |
| 373 | Carbamazepine                | 2,77             | 473 | Mefenamic acid                 | 2,71             | 573 | Iproniazid                   | 3,65             |
| 374 | Cefoperazone acid            | 1,01             | 474 | Melphalan                      | 0,09             | 574 | Benzamil HCl                 | 1,83             |
| 375 | Cefotaxime acid              | 1,43             | 475 | Methyldopa                     | 3,09             | 575 | Bupivacaine HCl              | 2,27             |
| 376 | Ceftazidime                  | 1,20             | 476 | Methylprednisolone             | 1,75             | 576 | Astemizole                   | 0,06             |
| 377 | Chloramphenicol              | 2,02             | 477 | Metoprolol tartrate            | 2,44             | 577 | Ketotifen fumarate           | 2,11             |
| 378 | Chlormadinone acetate        | 1,46             | 478 | Methimazole                    | 5,72             | 578 | Levocastine HCl              | 0,03             |
| 379 | Chlorambucil                 | 2,15             | 479 | Metronidazole                  | 3,82             | 579 | Naloxone HCl                 | 2,00             |
| 380 | Chlorpheniramine maleate     | 2,38             | 480 | Miconazole                     | 1,57             | 580 | Naloxonazine 2HCl            | 0,04             |
| 381 | Chloroquine phosphate        | 2,04             | 481 | Minocycline HCl                | 1,43             | 581 | Harmine                      | 3,08             |
| 382 | Thalidomide                  | 2,53             | 482 | Mitoxantrone 2 HCl             | 0,06             | 582 | Cinaserin                    | 1,92             |
| 383 | Ciprofloxacin                | 1,97             | 483 | Taxol                          | 0,03             | 583 | Dibenzepine HCl              | 2,21             |
| 384 | Citalopram                   | 2,01             | 484 | Myclobutanil                   | 2,26             | 584 | Dihydroergocristine mesylate | 1,07             |
| 385 | Clarithromycin               | 0,87             | 485 | Nadifloxacin                   | 1,81             | 585 | Fluperlapine                 | 2,11             |
| 386 | Climbazole                   | 2,23             | 486 | Nabumetone                     | 2,86             | 586 | Fluoxetine HCl               | 2,11             |
| 387 | Clinafloxacin HCl            | 1,79             | 487 | Naphazoline HCl                | 3,11             | 587 | Ondansetron                  | 0,04             |
| 388 | Clomiphene citrate           | 1,61             | 488 | Nefazodone                     | 1,39             | 588 | Ketanserin tartrate          | 1,65             |
| 389 | Amisulprid                   | 1,77             | 489 | Niflumic acid                  | 2,32             | 589 | Tiotropium Br                | 1,38             |
| 390 | Clopidogrel sulfate          | 2,03             | 490 | Norethindrone                  | 2,19             | 590 | Mesoridazine besylate        | 0,07             |
| 391 | Clobetasol propionate        | 1,40             | 491 | Norfloxacin                    | 2,05             | 591 | Thioridazine HCl             | 1,76             |
| 392 | Orphenadrine citrate         | 1,42             | 492 | Nystatin                       | 0,71             | 592 | Cilostamide                  | 0,08             |
| 393 | Corticosterone               | 1,89             | 493 | Ofloxacin                      | 1,81             | 593 | Etazolate                    | 0,09             |
| 394 | Crotamiton                   | 3,22             | 494 | Oflupraz                       | 2,89             | 594 | Amrinone                     | 0,14             |
| 395 | Cyclophosphamide monohydrate | 2,50             | 495 | Omeprazole                     | 1,89             | 595 | Irsogladine maleate          | 2,55             |
| 396 | Cyproterone acetate          | 1,57             | 496 | Oxcarbazepine                  | 2,59             | 596 | Mirinone                     | 0,12             |
| 397 | Cycloctidine HCl             | 0,12             | 497 | Oxiconazole nitrate            | 1,52             | 597 | Rolipram                     | 2,37             |
| 398 | Cytarabine                   | 0,11             | 498 | Oxaliillin sodium monohydrate  | 1,63             | 598 | Siguazodan                   | 0,09             |
| 399 | Dacarbazine                  | 3,59             | 499 | Oxfendazole                    | 2,07             | 599 | Trequisin HCl                | 1,48             |
| 400 | Danazol                      | 1,94             | 500 | Oxibendazole                   | 0,10             | 600 | Vinpocetine                  | 1,86             |

| Nr. | Drug                                                                        | final conc. [µM] |
|-----|-----------------------------------------------------------------------------|------------------|
| 601 | Zaprinast                                                                   | 2,41             |
| 602 | Zardaverine                                                                 | 0,10             |
| 603 | Alprostadil                                                                 | 1,84             |
| 604 | Misoprostol                                                                 | 0,07             |
| 605 | Artesunate                                                                  | 1,70             |
| 606 | Picotamide                                                                  | 1,74             |
| 607 | Butoconazole nitrate                                                        | 1,38             |
| 608 | Mifepristone                                                                | 0,03             |
| 609 | Megestrol acetate                                                           | 1,70             |
| 610 | Melengestrol acetate                                                        | 0,07             |
| 611 | Tamoxifen citrate                                                           | 0,07             |
| 612 | Amprenavir                                                                  | 1,29             |
| 613 | Aprepitant                                                                  | 1,22             |
| 614 | Bosentan                                                                    | 1,18             |
| 615 | Efavirenz                                                                   | 2,07             |
| 616 | Taurocholic acid, sodium salt hydrate                                       | 1,27             |
| 617 | Miglustat                                                                   | 2,98             |
| 618 | Fulvestrant                                                                 | 1,08             |
| 619 | Methysergide                                                                | 0,02             |
| 620 | Esmolol                                                                     | 2,21             |
| 621 | Pantothenic acid                                                            | 2,98             |
| 622 | Capecitabine                                                                | 1,82             |
| 623 | Phenylpropanolamine                                                         | 4,32             |
| 624 | Succinylcholine                                                             | 2,25             |
| 625 | L-thyroxine[[3-[4-(4-hydroxy-3,5-diiodophenoxy)-3,5-diidophenyl]-l-alanine] | 0,84             |
| 626 | Cyproheptadine                                                              | 2,27             |
| 627 | Benzylamine                                                                 | 2,11             |
